# Supplementary material for: Stacking of ultra-thin reduced graphene oxide nanoparticles in supramolecular structures for optoelectronic applications
Source: Royal Society of Chemistry journal article supplement (doi:10.1039/c4ra15705b), 2015-01-01
Supplement: c4ra15705b1.pdf [file c4ra15705b1.pdf]

## Stacking of Ultra-thin Reduced Graphene Oxide Nanoparticles in Supramolecular Structures for Optoelectronic Applications

Manish Kumar and Sandeep Kumar\*

Raman Research Institute, C.V. Raman Avenue, Sadashivanagar, Bangalore - 560 080, India

Phone: +91 80 23610122, Fax: +91 80 23610492, E-mail: [skumar@rri.res.in](mailto:skumar@rri.res.in)

### 1. FESEM of graphene oxide and GONP

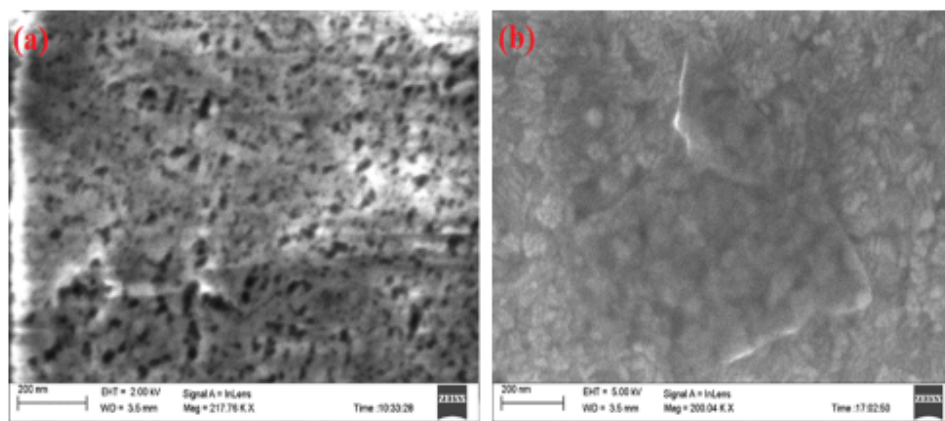

**Fig. S1** (a) FESEM image of f-rGONPs, and (b) FESEM image of ultra-thin GO sheet.

In Fig. S1 (b) we can see the ultra-thin features of doubly oxidized graphene oxide (GO) sheet showing the ITO substrate clearly indicating transparent feature of GO monolayer.

## 2. Optical properties of f-rGONPs: UV-Vis and Fluorescence Spectroscopy

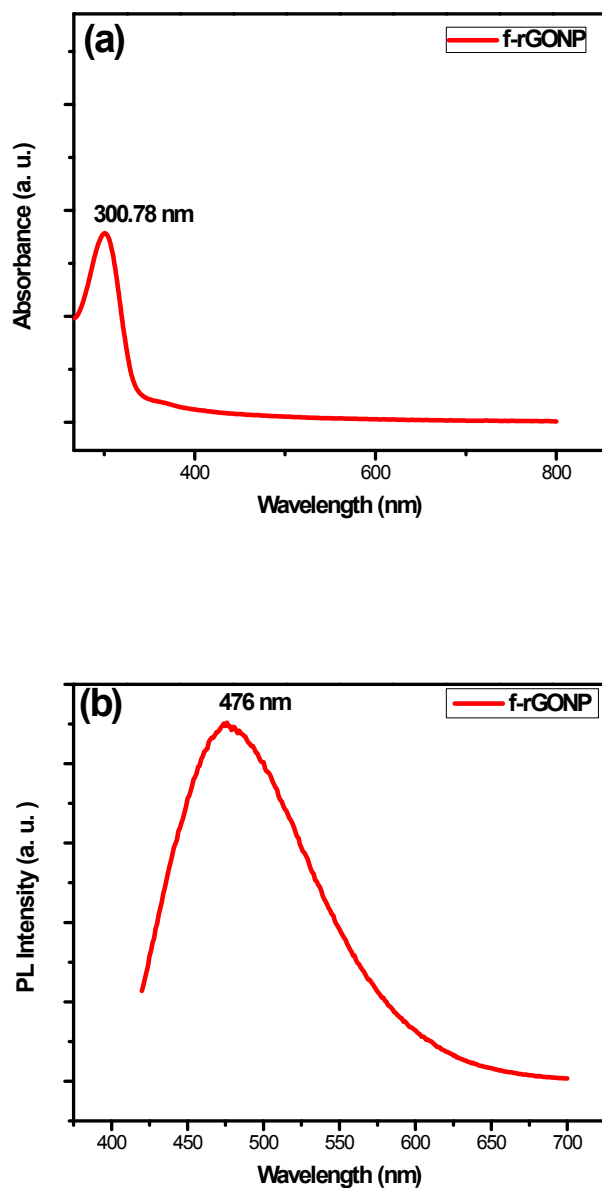

**Fig. S2** (a) UV-vis absorption spectra of f-rGONP, and (b) PL spectra of f-rGONP at excitation wavelength of 400nm (dispersed in chloroform).
